# Supplementary material for: Quadruplex-Forming Motif Inserted into 3′UTR of Ty1his3-AI Retrotransposon Inhibits Retrotransposition in Yeast
Source: MDPI journal article supplement (doi:10.3390/biology10040347), 2021-04-20
Supplement: s1 [file s1]

>Tylhis3-AI

ACGGATTAGAAGCCGCCGAGCGGGCGACAGCCCTCCGACGGAAGACTCTCCTCCGTGCGTCCTCGTCTTCACC  
GGTCGCGTTTCCTGAAACGCAGATGTGCCTCGCGCCGCACTGCTCCGAACAATAAAGATTCTACAATACTAGCT  
TTTATGGTTATGAAGAGGAAAAATTGGCAGTAACCTGGCCCCACAAACCTTCAAATTAACGAATCAAATTAAC  
AACCATAGGATGATAATGCGATTAGTTTTTTTAGCCTTATTTCTGGGGTAATTAATCAGCGAAGCGATGATTTT  
TGATCTATTAACAGATATATAAATGGAAAAGCTGCATAACCACTTTAACTAATACTTTCAACATTTTCGGTTT  
GTATTACTTCTTATTCTCTACCGCCTCGAGGAGAAGCTTCTAGTATATTCTGTATACCTAATATTATAGCCTT  
TATCAACAATGGAATCCCAACAATTATCTCAACATTCACCCAATTCTCATGGTAGCGCCTGTGCTTCGGTTAC  
TTCTAAGGAAGTCCACACAAATCAAGATCCGTTAGACGTTTCAGCTTCCAAAACAGAAGAATGTGAGAAGGCT  
TCCACTAAGGCTAACTCTCAACAGACAACAACACCTGCTTCATCAGCTGTTCCAGAGAACCCCCATCATGCCT  
CTCCTCAACCTGCTTCAGTACCACCTCCACAGAATGGGCCGTACCCACAGCAGTGCATGATGACCCAAAACCA  
AGCCAATCCATCTGGTTGGTTCATTTTACGGACACCCATCTATGATTCCGTATACACCTTATCAAATGTGCCT  
ATGTACTTTCCACCTGGGCCACAATCACAGTTTTCCGCAGTATCCATCATCAGTTGGAACGCCTCTGAGCACTC  
CATCACCTGAGTCAGGTAATACATTTACTGATTTCATCCTCAGCGGACTCTGATATGACATCCACTAAAAATA  
TGTCAGACCACCACCAATGTTAACCTCACCTAATGACTTTCCAAATTGGGTAAAAACATACATCAAATTTTTA  
CAAACTCGAATCTCGGTGGTATTATTCCGACAGTAAACGGAAAACCCGTACGTCAGATCACTGATGATGAAC  
TCACCTTCTTGATATAACACTTTTCAAATATTTGCTCCCTCTCAATTCTACCTACCTGGGTCAAAGACATCCT  
ATCCGTTGATTATACGGATATCATGAAAATTTCTTTCCAAAAGTATTGAAAAAATGCAATCTGATACCCAAGAG  
GCAACGACATTGTGACCCTGGCAAATTTGCAATATAATGGCAGTACACCTGCAGATGCATTTGAAACAAAAG  
TCACAAACATTATCGACAGACTGAACAATAATGGCATTTCATATCAATAACAAGGTCGCATGCCAATTAATTAT  
GAGAGGTCTATCTGGCGAATATAAATTTTTACGCTACACACGTCATCGACATCTAAATATGACAGTCGCTGAA  
CTGTTCTTAGATATCCATGCTATTTATGAAGAACAACAGGGATCGAGAAACAGTAAACCTAATTACAGGAGAA  
ATCCGAGTGATGAGAAGAATGATTCTCGCAGCTATACGAATACAACCAAACCCAAAGTTATAGCTCGGAATCC  
TCAAAAAACAAATAATTGCAAAATCGAAAACAGCCAGGGCTCACAATGTATCCACATCTAATAACTCTCCCAGC  
ACGGACAACGATTCCATCAGTAAATCAACTACTGAACCGATTCAATTGAACAATAAGCACGACCTTCATCTTA  
GGCCAGAACTTACTGAATCTACAGTAAATCATACTAATCATTCTGATGATGAACTCCCTGGACACCTCCTTC  
TCGATTACAGGAGCATCACGAACCCTTATAAGATCTGCTCATCACATACACTCAGCATCATCTAATCCTGACAT  
AAACGTAGTTGATGCTCAAAAAAGAAATATACCAATTAACGCTATTGGTGACCTACAATTTCACTTCCAGGAC  
AACACCAAACATCAATAAAGGTATTGCACACTCCTAACATAGCCTATGACTTACTCAGTTTGAATGAATTGG  
CTGCAGTAGATATCACAGCATGCTTTACCAAAAACGCTCTTAGAACGGTCTGACGGCACTGTACTTGCACCTAT  
CGTAAATATGGAGACTTTTACTGGGTATCTAAAAAGTACTTGCTTCCATCAAATATCTCCGTACCCACCATC  
AATAATGTCCATACAAGTGAAAGTACACGCAAATATCCTTATCCTTTTATTTCATTCGAATGCTTGCGCATGCCA  
ATGCACAGACAATTCGATACTCACTTAAAAATAACACCATCACGTATTTTAAACGAATCAGATGTGACTGGTC  
TAGTGCTATTGACTATCAATGTCCTGATTGTTTAAATCGGCAAAAGCACCAAACACAGACATATCAAAGGTTCA  
CGACTAAAATACCAAATTCATACGAACCCTTTCAATACCTACATACTGACATATTTGGTCCAGTTTACAACC  
TACCAAATAGTGACCATCCTATTTTCATCTCATTTTACTGATGAGACAACAAAATTCGTTGGGTTTATCCATT  
ACACGACCGTCGCGAGGACTCTATCCTCGATGTTTTTACTACGATACTAGCTTTTATTAAAAACAGTTTCAG  
GCCAGTGCTTGGTTATACAAATGGACCGTGGTTCTGAGTATACTAACAGAACTCTCCATAAATTCCTTGAAA  
AAAATGGTATAACTCCATGCTATACAACCACAGCGGATTCCCGAGCACATGGAGTCGCTGAACGGCTAAACCG  
TACCTTATTAGATGACTGCCGTACTCAACTGCAATGTAGTGTTTTACCGAACCATTATGGTTCTCTGCAATC  
GAATTTTCTACTATTGTGAGAAATTCAGTACTTACCTTAAAGCAAAAAATCTGCAAGACAACATGCTGGCT  
TGGCAGGACTTGATATCAGTACTTTGTTTACCTTTTCGGTCAACCTGTTATCGTCAATGATCACAACCCTAACTC  
CAAAATACATCCTCGTGCCATCCCAGGCTACGCTCTACATCCGTCTCGAACTCTTATGGATATATCATCTAT  
CTTCCATCCTTAAAGAAGACAGTAGATACAACCTAACTATGTTATTCTTCAGGGCAAGGAATCCAGATTAGATC  
AATTCAATTACGACGCACTCACTTTCGATGAAGACTTAAACCGTTTAACTGCTTCATATCATTTCGTTTCATTGC  
GTCAAATGAGATCCAAGAATCCAATGATCTTAACATAGAATCTGACCATGACTTCCAATCCGACATTGAACCTA  
CATCCTGAGCAACCGAGAAATGTCCTTTCAAAGCTGTGAGTCCAACCGATTCCACACCTCCGTCAACTCATA  
CTGAAGATTGCAACCGTGTTTCTAAAACCAATATTTCGCGCACCCAGAGAAGTTGACCCCAACATATCTGAATC  
TAATATTCTTCCATCAAAGAAGAGATCTAGCACCCCCAAATTTCCAATATCGAGAGTACCGGTTTCGGGTGGT  
ATGCATAAATTAATGTTCTTTACTTGCTCCCATGTCCCAATCTAACACACATGAGTCGTCGCACGCCAGTA  
AATCTAAAGATTTTCAGACACTCAGACTCGTACAGTGAAAAAGACTAATCATACAAACGTACCAATATCCAG  
TACGGTTGGTACCAACAACAAAACCTGTTCCGCAGATAAGTGACCAAGAGACTGAGAAAAGGATTATACACCGT  
TCACCTTCAATTGATGCTTCTCCACCGGAAAATAATTCATCGCACAAATATTGTTCTTATCAAACGCCAACTA  
CTGTTTCTGAACAGAATACCGAGGAATCTATCATCGCTGATCTCCCACTCCCTGATCTACCTCCAGAATCTCC  
TACCGAATTCCCTGACCCATTTAAAGAAGTCCACCGATAAATTTCTCGTCAAACCTAATTCAGTTTGGGTGGT  
ATTGGTGACTCTAATGCCTATACTACTATCAACAGTAAGAAAAGATCATTAGAAGATAATGAACTGAAATTA  
AGGTATCACGAGACACATGGAATACTAAGAATATGCGTAGTTTTAGAACCTCCGAGATCGAAGAAACGAATTCA  
CCTGATTGCAGCTGTAAAAGCAGTAAATCAATCAAACCAATACGGACAACCTTACGATACGATGAGGCAATC

ACCTATAATAAAGATATTAAAGAAAAAGAAAAATATATCGAGGCATACCACAAAGAAGTCAATCAACTGTTGA  
AGATGAAAACCTTGGGACACTGACGAATATTATGACAGAAAAGAAATAGACCCTAAAAGAGTAATAAACTCAAT  
GTTTATCTTCAACAAGAAACGTGACGGTACTCATAAAGCTAGATTTGTTGCAAGAGGTGATATTCAGCATCCT  
GACACTTACGACTCAGGCATGCAATCCAATACCGTACATCACTATGCATTAATGACATCCCTGTCACCTGTCAT  
TAGACAATAACTACTATATTACACAATTAGACATATCTTCGGCATATTTGTATGCAGACATCAAAGAAGAATT  
ATACATAAGACCTCCACCACATTTAGGAATGAATGATAAGTTGATACGTTTGAAGAAATCACTTTATGGATTG  
AAACAAAGTGGAGCGAACTGGTACGAACTATCAAATCATACCTGATACAACAATGTGGTATGGAAGAAGTTC  
GTGGATGGTCATGCGTATTTAAAAACAGTCAAGTGACAATTTGTTTATTTCGTAGATGATATGGTATTGTTTAG  
CAAAAATCTAAATTCAAACAAAAGAATTATAGAGAAGCTTAAGATGCAATACGACACCAAGATTATAAATCTA  
GGCGAAAGTGATGAGGAAATTCAATATGACATACTTGGCTTAGAAATCAAATATCAAAGAGGTAAATACATGA  
AATTAGGTATGGAAGAACTCATTAAGTGAAGAAATACCCAAATTAAACGTACCTTTGAATCCAAAAGGAAGAAA  
ACTTAGCGCTCCAGGTCAACCAGGTCTTTATATAGACCAGGATGAAGTAGAAATAGATGAAGATGAATACAAA  
GAGAAGGTACATGAAATGCAAAAGTTGATTGGTCTAGCTTCATATGTTGGATATAAATTTAGATTTGACTTAC  
TATACTACATCAACACACTTGCTCAACATATACTATTCCCTCTAGGCAAGTTTTAGACATGACATATGAGTT  
GATACAATTCATGTGGGACACTAGAGATAAAACAACTGATATGGCACAAAAACAACTACCGAGCCAGATAAT  
AAACTAGTCGCAATAAGTGATGCTTCGTATGGCAACCAACCGTATTATAAATCACAAATTGGCAACATATATT  
TACTTAATGGAAAGGTAATTGGAGGAAAGTCCACCAAGGCTTCATTAACATGTACTTCAACTACGGAAGCAGA  
AATACACGCGATAAGTGAATCTGTCCCATTATTAATAAATCTAAGTTACCTGATACAAGAACTTAACAAGAAA  
CCAATTATTAAGGCTTACTTACTGATAGTAGATCAACGATCAGTATAATTAAGTCTACAAATGAAGAGAAAT  
TTAGAAACAGATTTTTTGGCACAAAGGCAATGAGACTTAGAGATGAAGTATCAGGTAATAATTTATACGTATA  
CTACATCGAGACCAAGAAGAACATTGCTGATGTGATGACAAAACCTCTTCCGATAAAAAACATTTAACTATTA  
ACTAACAATGGATTCAATTAGATCTATCGATAAGCTTCTGCAGCTTTAAATAATCGGTGTCACATACATAAGAA  
CACCTTTGGTGGAGGGAACATCGTTGGTACCATTGGGCGAGGTGGCTTCTCTTATGGCAACCGCAAGAGCCTT  
GAACGCACTCTCACTACGGTGATGATCATTCTTGCCCTCGCAGACAATCAACGTGGAGGGTAATTCTGCTAGCC  
TCTGCAAAGCTTTCAAGAAAATGCGGGATCATCTCGCAAGAGAGATCTCCTACTTTCTCCCTTTGCAAACCAA  
GTTTCGACAACTGCGTACGGCCTGTTTCGAAAGATCTACCACCGCTCTGGAAAGTGCCATCCAAAGGCGCAAA  
TCCTGATCCAAACCTTTTTACTCCACGCACGGCCCCCTAGGGCCTCTTTAAAGCTTGACCGAGAGCAATCCCG  
CAGTCTTCAGTGGTGTGATGGTCGTCTATGTGTAAGTCACCAATGCACTCAACGATTAGCGACCAGCCGGAAT  
GCTTGGGTATGTTAATATGGACTAAAGGAGGCTTTTCTGCAGGTCGACTCTAGAGGATCCCCGGGTACCGAGC  
TCGAATTTTTACTAACAATGGTATTATTTATAACAGCCAGAGCATGTATCATATGGTCCAGAAACCCCTATAC  
CTGTGTGGACGTTAATCACTTGCGATTGTGTGGCCTGTTCTGCTACTGCTTCTGCCTCTTTTTCTGGGAAGAT  
CGAGTGCTCTATCGCTAGGGGACCACCCTTTAAAGAGATCGCAATCTGAATCTTGGTTTCATTTGTAATACGC  
TTTACTAGGGCTTTCTGCTCTGTCATCTTTGCCTTCGTTTATCTTGCCTGCTCATTTTTTTAGTATATTCTTCG  
AAGAAATCACATTACTTTATATAATGTATAATTCATTATGTGATAATGCCAATCGCTAAGAAAAAAAAAAGAGT  
CATCCGCTAGGTGGAAAAAAAAAAAAATGAAATCATTACCGAGGCATAAAAAAATATAGAGTGTACTAGAGGCT  
CCAAGAGTGTACTAGAGGATCCCGCGGGGAGCTCGAATTCGAGCTTATCGATAGATCTATTACATTATGGGT  
GGTATGTTGGAATAGAAATCAACTATCATCTACTAAGTATTTACATTACTAGTATATTATCATATACGGT  
GTTAGAAGATGACGCAAATGATGAGAAATAGTCATCTAAATTAGTGGAAGCTGAAACGCAAGGATTGATAATG  
TAATAGGATCAATGAATATAAACATATAAAATGATGATAATAATATTTATAGAATTGTGTAGAATTGCAGATT  
CCCTTTTATGGATTCCCTAAATCCTTGAGGAGAACTTCTAGTATATTCTGTATACCTAATATTATAGCCTTTAT  
CAACAATGGAATCCCAACAATTATCTCAACATTCACCCATTTCTCA
