# Supplementary material for: Quadruplex-Forming Motif Inserted into 3′UTR of Ty1his3-AI Retrotransposon Inhibits Retrotransposition in Yeast
Source: MDPI journal article supplement (doi:10.3390/biology10040347), 2021-04-20
Supplement: s1 [file s1]

| Name        | sequence 5'-3'               | Use                  |
|-------------|------------------------------|----------------------|
| URA3_F      | GCGGCAGAAGAAGTAACAAAGG       | qRT-PCR              |
| URA3_R      | ATCTTTGTCTGCTCTTCGCAATG      |                      |
| His3_F      | CCTTCGTTTATCTTGCCTGCTC       |                      |
| His3_R      | TTTTCCACCTAGCGGATGACTC       |                      |
| WT          | CCCCGGGGCGGGGCGGGGCGGGGCGGGG | CD spectroscopy      |
| M1          | CCCCGGGGCGGGGCGAAGCGGGGCGGGG |                      |
| M2          | CCCCGAAGCGAAGCGAAGCGAAGCGGGG |                      |
| Ty1_probe_F | TGGTGGAGGGAACATCGTTG         | southern blot probe  |
| Ty1_probe_R | ATTCCGGCTGGTCGCTAATC         |                      |
| WT_top      | CGGGGCGGGGCGGGGCGGGGC        | plasmid construction |
| WT_bottom   | GCCCCGCCCCGCCCCGCCCCG        |                      |
| M1_top      | CGGGGCGGGGCGAAGCGGGGC        |                      |
| M1_bottom   | GCCCCGCTTCGCCCCGCCCCG        |                      |
| M2_top      | CGAAGCGAAGCGAAGCGAAGC        |                      |
| M2_bottom   | GCTTCGCTTCGCTTCGCTTCG        |                      |
