# Supplementary material for: Quadruplex-Forming Motif Inserted into 3′UTR of Ty1his3-AI Retrotransposon Inhibits Retrotransposition in Yeast
Source: MDPI journal article supplement (doi:10.3390/biology10040347), 2021-04-20
Supplement: s1 [file s1]

# Supplemental materials

## Quadruplex-forming motif inserted into 3'UTR of Ty1 retrotransposon inhibits retrotransposition in yeast

Viktor Tokan<sup>1</sup>, Jose Luis Rodriguez Lorenzo<sup>1</sup>, Pavel Jedlicka<sup>1</sup>, Iva Kejnovska<sup>2</sup>, Roman Hobza<sup>1</sup>, Eduard Kejnovsky<sup>1\*</sup>

<sup>1</sup>*Department of Plant Developmental Genetics, Institute of Biophysics of the Czech Academy of Sciences, Kralovopolska 135, 61200 Brno, Czech Republic*

<sup>2</sup>*Department of Biophysics of Nucleic Acids, Institute of Biophysics of the Czech Academy of Sciences, Kralovopolska 135, 61200 Brno, Czech Republic*

\* Author for Correspondence: Eduard Kejnovsky, Department of Plant Developmental Genetics, Institute of Biophysics of the Czech Academy of Sciences, Kralovopolska 135, CZ-612 00 Brno, Czech Republic, phone: +420-541517203, E-mail: kejnovsk@ibp.cz

| Name        | sequence 5'-3'               | Use                  |
|-------------|------------------------------|----------------------|
| URA3_F      | GCGGCAGAAGAAGTAACAAAGG       | qRT-PCR              |
| URA3_R      | ATCTTTGTCGCTCTTCGCAATG       |                      |
| His3_F      | CCTTCGTTTATCTTGCCTGCTC       |                      |
| His3_R      | TTTTCCACCTAGCGGATGACTC       |                      |
| WT          | CCCCGGGGCGGGGCGGGGCGGGGCGGGG | CD spectroscopy      |
| M1          | CCCCGGGGCGGGGCGAAGCGGGGCGGGG |                      |
| M2          | CCCCGAAGCGAAGCGAAGCGAAGCGGGG |                      |
| Ty1_probe_F | TGGTGGAGGGAACATCGTTG         | southern blot probe  |
| Ty1_probe_R | ATTCCGGCTGGTCGCTAATC         |                      |
| WT_top      | CGGGGCGGGGCGGGGCGGGGC        | plasmid construction |
| WT_bottom   | GCCCCGCCCCGCCCCGCCCCG        |                      |
| M1_top      | CGGGGCGGGGCGAAGCGGGGC        |                      |
| M1_bottom   | GCCCCGCTTCGCCCCGCCCCG        |                      |
| M2_top      | CGAAGCGAAGCGAAGCGAAGC        |                      |
| M2_bottom   | GCTTCGCTTCGCTTCGCTTCG        |                      |

**Table S1. Overview of oligonucleotides used in this study**

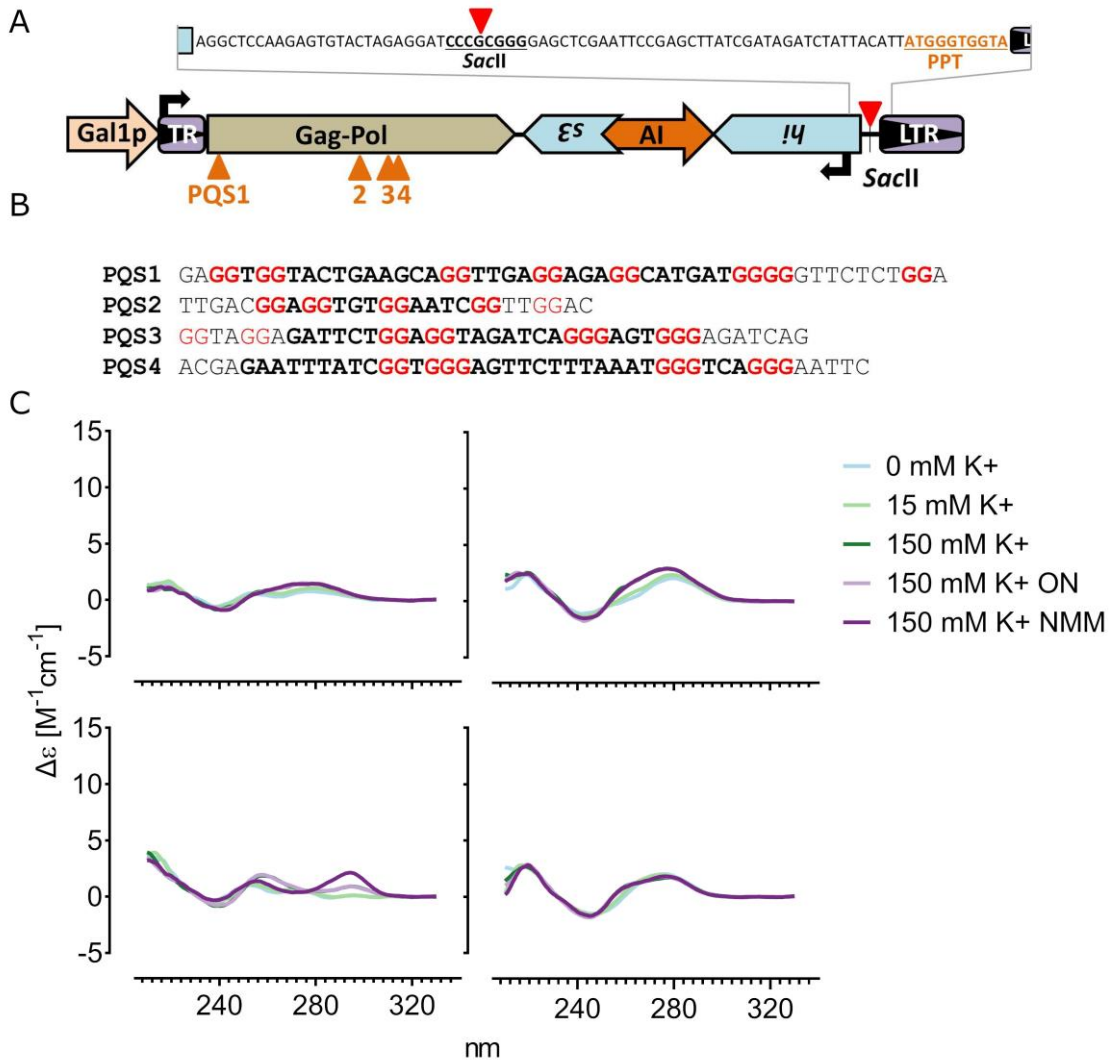

**Figure S1. Analysis of endogenous PQS in *Ty1his3-AI* retrotransposon.**

(A) A schematic localisation of predicted potential quadruplex forming sequences (PQS; orange triangles) within *Ty1his3-AI* retrotransposon. G-rich strand of all predicted sequences is template strand for transcription. Red triangles show the cloning *SacII* site where sequences of interest were inserted. The polypurine tract (PPT) is also highlighted. (B) Oligonucleotides used for CD spectroscopy measurement containing both predicted sequences (bold) and surrounding sequences. Guanines possibly forming G4 are red. (C) CD spectra obtained in increasing potassium concentration at 22 °C. After overnight incubation (ON) in 150mM K<sup>+</sup> samples were also measured with the addition of 7,5 μM NMM to force G4 formation.

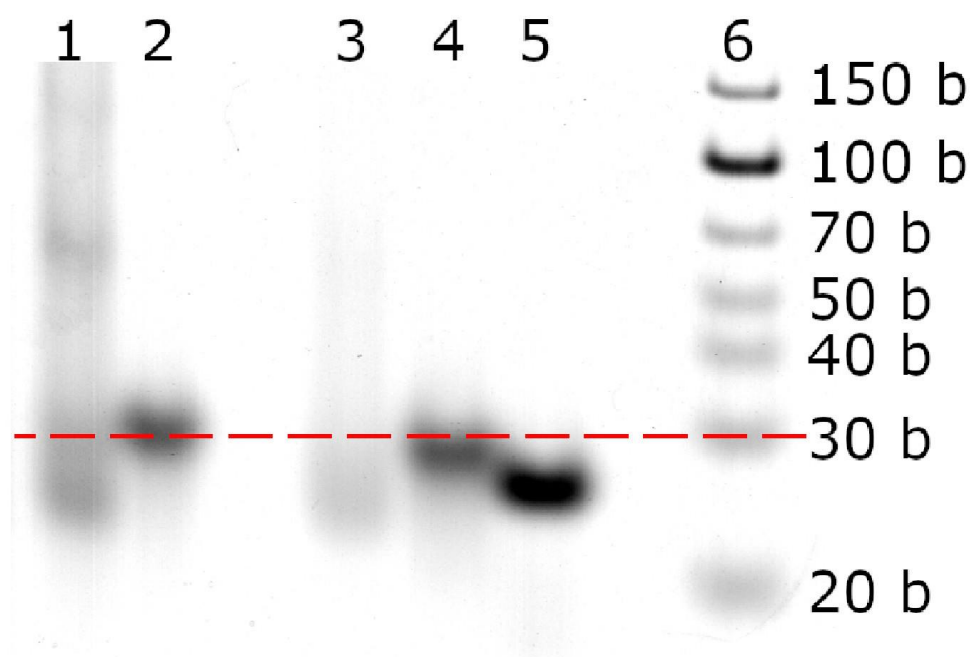

**Figure S2. Native PAGE**

Annealed oligonucleotides WT and M1 (lines 1 and 2), oligonucleotides WT, M1 and M2 without annealing (lines 3-5), size marker (line 6). All tested oligonucleotides adopted monomolecular organization but WT also formed a bimolecular fraction after annealing in 150 mM potassium.

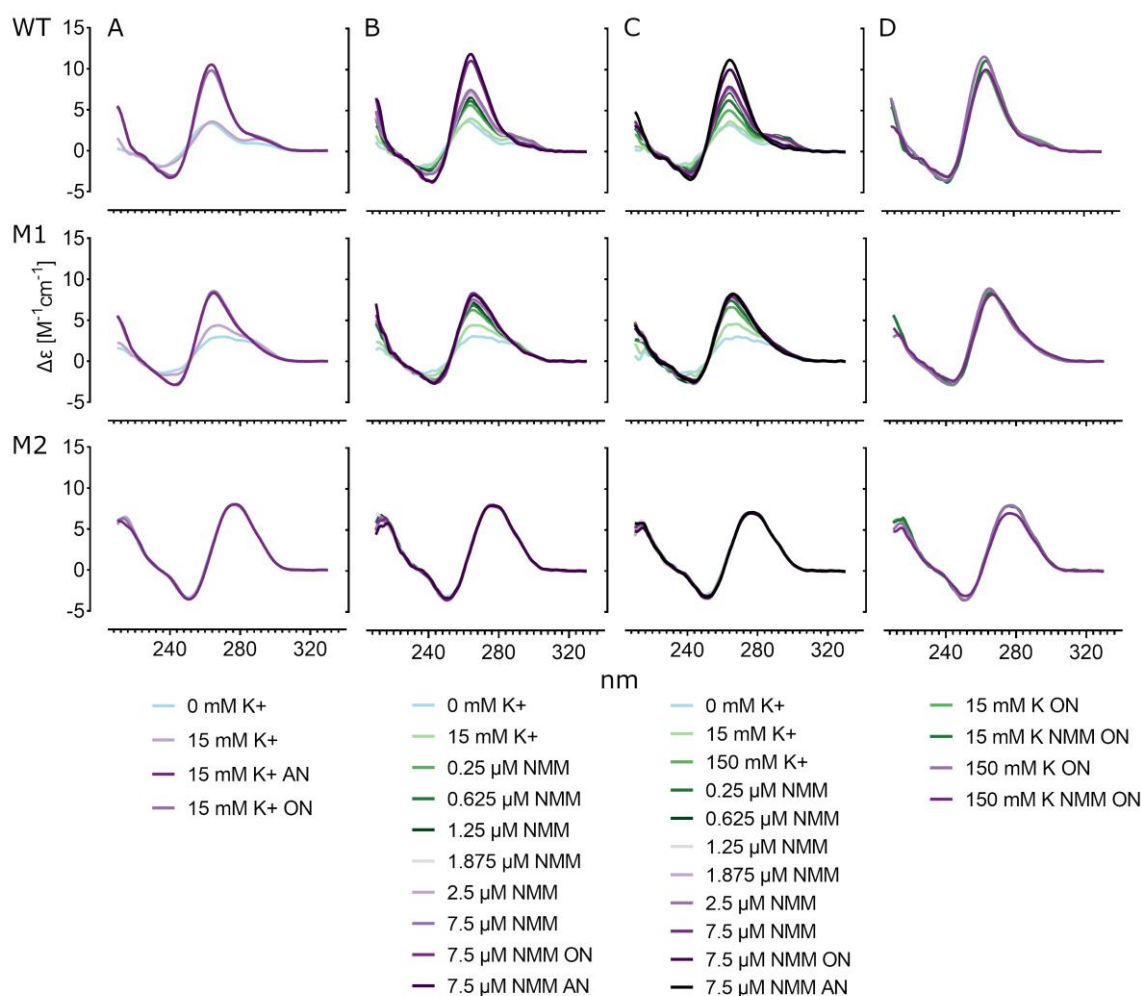

**Figure S3. Effect of potassium and NMM concentration on G4 formation and kinetics measured by circular dichroism (CD).** (A) CD obtained in final 15mM potassium. (B) Increasing NMM concentration in presence of 15mM potassium ions shows acceleration of G4 formation. (C) Effect of an increasing NMM concentration on the ellipticity in presence of 150mM potassium ions showing similar results as in 15mM potassium. (D) Comparison of overnight incubated samples in both 15mM and 150mM potassium as well as with and without NMM shows negligible differences which suggest that 15mM potassium is fully sufficient to induce G4 formation and NMM have no effect on G4 topology and orderliness. Note that M2 spectra remain unaffected by both NMM and potassium concentration. ON - overnight, AN - annealed.

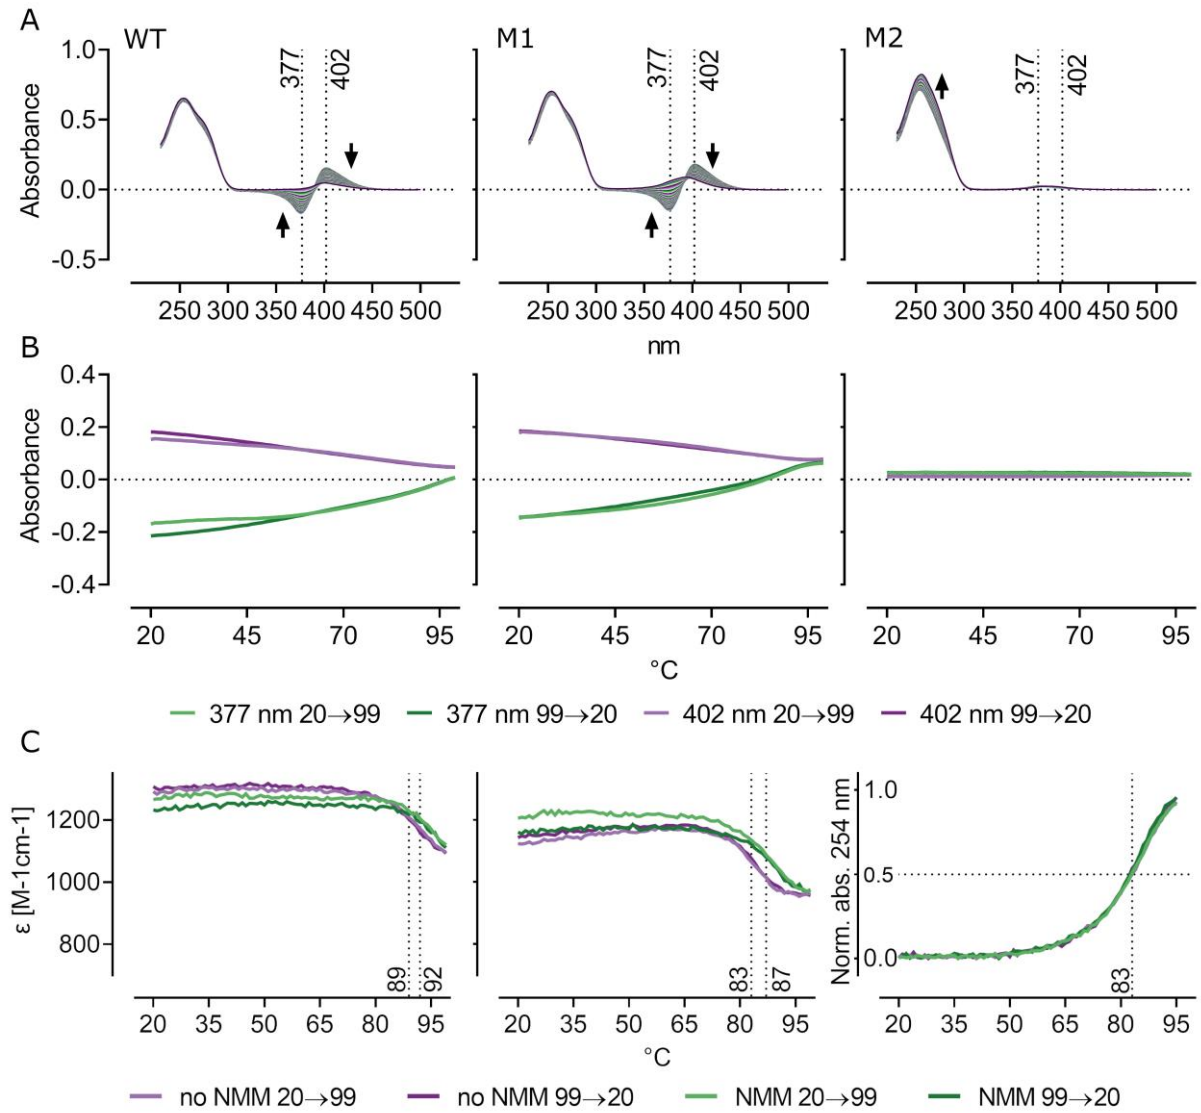

**Figure S4. DNA melting assay in 150 mM potassium**

(A) Full absorption spectra obtained during heating samples from 20 to 99°C in 150 mM potassium with 7.5 μM NMM present typical peaks at 377 and 402 nm of free and G4-bound NMM respectively. Black arrows indicate peak development with increasing temperature. (B) Absorbance at 377 and 402 nm plotted against temperature revealing a disruption of NMM-G4 interaction by increasing temperature and reassociation when cooling down. (C) Comparison of melting curves at 297 nm in 150 mM potassium shows a shift towards a higher temperature due to NMM presence. Indicated T<sub>m</sub> are rough estimates calculated from normalised data. Melting curves for M2 are calculated as normalised absorbance at 254 nm.

## Supplemental file 1. *Ty1his3-AI* sequence

>Ty1his3-AI

ACGGATTAGAAGCCGCCGAGCGGGCGACAGCCCTCCGACGGAAGACTCTCCTCCGTGCGTCCTCGTCT  
TCACCGGTGCGGTTCCCTGAAACGCAGATGTGCCTCGCGCCGCACTGCTCCGAACAATAAAGATTCTAC  
AATACTAGCTTTTATGGTTATGAAGAGGAAAAATGGCAGTAACCTGGCCCCACAAACCTTCAAATTA  
ACGAATCAAATTAACAACCATAGGATGATAATGCGATTAGTTTTTTAGCCTTATTTCTGGGGTAATTA  
ATCAGCGAAGCGATGATTTTTGATCTATTAACAGATATATAAATGGAAAAGCTGCATAACCACTTTAA  
CTAATACTTTCAACATTTTTCGGTTTGTATTACTTCTTATTCTCTACCGCTCGAGGAGAACTTCTAG  
TATATTCTGTATACCTAATATTATAGCCTTTATCAACAATGGAATCCCAACAATTATCTCAACATTCA  
CCCAATTCTCATGGTAGCGCCTGTGCTTCGGTTACTTCTAAGGAAGTCCACACAAATCAAGATCCGTT  
AGACGTTTCAGCTTCCAAAACAGAAGAATGTGAGAAGGCTTCCACTAAGGCTAACTCTCAACAGACAA  
CAACACCTGCTTCATCAGCTGTTCCAGAGAACCCCCATCATGCCTCTCCTCAACCTGCTTCAGTACCA  
CCTCCACAGAATGGGGCGTACCCACAGCAGTGCATGATGACCCAAAACCAAGCCAATCCATCTGGTTG  
GTCATTTTACGGACACCCATCTATGATTCCGTATACACCTTATCAAATGTGCGCTATGTACTTTCCAC  
CTGGGCCACAATCACAGTTTCCGCAGTATCCATCATCAGTTGGAACGCCTCTGAGCACTCCATCACCT  
GAGTCAGGTAATACATTTACTGATTCATCCTCAGCGGACTCTGATATGACATCCACTAAAAAATATGT  
CAGACCACCACCAATGTTAACCTCACCTAATGACTTTCCAAATTTGGGTAAACATACATCAAATTTT  
TACAAAACCTCGAATCTCGGTGGTATTATTCCGACAGTAAACGGAAAACCCGTACGTCAGATCACTGAT  
GATGAACTCACCTTCTTGTATAACACTTTTCAAATATTTGCTCCCTCTCAATTCCTACCTACCTGGGT  
CAAAGACATCCTATCCGTTGATTATACGGATATCATGAAAATTTCTTTCCAAAAGTATTGAAAAAATGC  
AATCTGATACCCAAGAGGCAAACGACATTGTGACCCTGGCAAATTTGCAATATAATGGCAGTACACCT  
GCAGATGCATTTGAAACAAAAGTCACAAACATTATCGACAGACTGAACAATAATGGCATTCATATCAA  
TAACAAGGTCGCATGCCAATTAATTATGAGAGGTCTATCTGGCGAATATAAATTTTTTACGCTACACAC  
GTCATCGACATCTAAATATGACAGTCGCTGAACTGTTCTTAGATATCCATGCTATTTATGAAGAACAA  
CAGGGATCGAGAAACAGTAAACCTAATTACAGGAGAAATCCGAGTGATGAGAAGAATGATTCTCGCAG  
CTATACGAATACAACCAAAACCCAAAGTTATAGCTCGGAATCCTCAAAAAACAAATAATTGCAAATCGA  
AAACAGCCAGGGCTCACAATGTATCCACATCTAATAACTCTCCCAGCACGGACAACGATTCCATCAGT  
AAATCAACTACTGAACCGATTCAATTGAACAATAAGCACGACCTTCATCTTAGGCCAGAACTTACTG  
AATCTACAGTAAATCATACTAATCATTCTGATGATGAACTCCCTGGACACCTCCTTCTCGATTTCAGGA  
GCATCACGAACCCCTTATAAGATCTGCTCATCACATACTCAGCATCATCTAATCCTGACATAAACGT  
AGTTGATGCTCAAAAAAGAAATATACCAATTAACGCTATTGGTGACCTACAATTTCACTTCCAGGACA  
ACACCAAAACATCAATAAAGGTATTGCACACTCCTAACATAGCCTATGACTTACTCAGTTTGAATGAA  
TTGGCTGCAGTAGATATCACAGCATGCTTTACCAAAAACGTCTTAGAACGGTCTGACGGCACTGTACT  
TGCACCTATCGTAAAATATGGAGACTTTTACTGGGTATCTAAAAAGTACTTGCTTCCATCAAATATCT  
CCGTACCCACCATCAATAATGTCCATACAAGTGAAAGTACACGCAAATATCCTTATCCTTTCATTTCAT  
CGAATGCTTGCGCATGCCAATGCACAGACAATTCGATACTCACTTAAAAATAACACCATCACGTATTT  
TAACGAATCAGATGTCGACTGGTCTAGTGCTATTGACTATCAATGTCCTGATTGTTTAATCGGCAAAA  
GCACCAACACAGACATATCAAAGGTTACGACTAAAATACCAAAATTCATACGAACCCCTTCAATAC  
CTACATACTGACATATTTGGTCCAGTTCACAACCTACCAAATAGTGCACCATCCTATTTTCATCTCATT  
TACTGATGAGACAACAAAATTCCGTTGGGTTTATCCATTACACGACCGTCGCGAGGACTCTATCCTCG  
ATGTTTTTACTACGATACTAGCTTTTATTA AAAAACCAGTTTCAGGCCAGTGCTTGGTTATACAAATG  
GACCGTG GTTCTGAGTATACTAACAGAACTCTCCATAAATTCCTTGAAAAAATGGTATAACTCCATG  
CTATACAACCACAGCGGATTCCCGAGCACATGGAGTCGCTGAACGGCTAAACCGTACCTTATTAGATG  
ACTGCCGTACTCAACTGCAATGTAGTGTTTACCGAACCATTATGGTTCTCTGCAATCGAATTTTCT  
ACTATTGTGAGAAATTCAGTAGCTTCACCTAAAAGCAAAAAATCTGCAAGACAACATGCTGGCTTGGC  
AGGACTTGATATCAGTACTTTGTTACCTTTTCGGTCAACCTGTTATCGTCAATGATCACAACCCCTAACT  
CCAAAATACATCCTCGTGGCATCCCAGGCTACGCTCTACATCCGTCTCGAACTCTTATGGATATATC  
ATCTATCTTCCATCCTTAAAGAAGACAGTAGATACAATAACTAATGTTATTCTTCAGGGCAAGGAATC

CAGATTAGATCAATTCAATTACGACGCACTCACTTTTCGATGAAGACTTAAACCGTTTAACTGCTTCAT  
ATCATTCGTTTCATTGCGTCAAATGAGATCCAAGAATCCAATGATCTTAACATAGAATCTGACCATGAC  
TTCCAATCCGACATTGAACTACATCCTGAGCAACCGAGAAATGTCCTTTCAAAAGCTGTGAGTCCAAC  
CGATTCCACACCTCCGTCAACTCATACTGAAGATTCGAAACGTGTTTCTAAAACCAATATTCGCGCAC  
CCAGAGAAGTTGACCCCAACATATCTGAATCTAATATTCTTCCATCAAAGAAGAGATCTAGCACCCCC  
CAAATTTCCAATATCGAGAGTACCGGTTTCGGGTGGTATGCATAAATTAAATGTTCCTTTACTTGTCTCC  
CATGTCCCAATCTAACACACATGAGTCGTCGCACGCCAGTAAATCTAAAGATTTTCAGACACTCAGACT  
CGTACAGTGAAAATGAGACTAATCATACAAACGTACCAATATCCAGTACGGGTGGTACCAACAACAAA  
ACTGTTCCGCAGATAAGTGACCAAGAGACTGAGAAAAGGATTATACACCGTTCACCTTCAATTGATGC  
TTCTCCACCGGAAAAATAATTCATCGCACAAATATTGTTTCCTATCAAAACGCCAACTACTGTTTCTGAAC  
AGAATACCGAGGAATCTATCATCGCTGATCTCCCACTCCCTGATCTACCTCCAGAATCTCCTACCGAA  
TTCCCTGACCCATTTAAAGAACTCCCACCGATAAATTCTCGTCAAATAATCCAGTTTGGGTGGTAT  
TGGTGACTCTAATGCCTATACTACTATCAACAGTAAGAAAAGATCATTAGAAGATAATGAACTGAAA  
TTAAGGTATCACGAGACACATGGAATACTAAGAATATGCGTAGTTTGAACCTCCGAGATCGAAGAAA  
CGAATTCACCTGATTGCAGCTGTAAAAGCAGTAAAATCAATCAAACCAATACGGACAACCTTACGATA  
CGATGAGGCAATCACCTATAATAAAGATATTAAGAAAAAGAAAAATATATCGAGGCATACCACAAAG  
AAGTCAATCAACTGTTGAAGATGAAAACCTGGGACACTGACGAATATTATGACAGAAAAGAAATAGAC  
CCTAAAAGAGTAATAAACTCAATGTTTATCTTCAACAAGAAACGTGACGGTACTCATAAAGCTAGATT  
TGTTGCAAGAGGTGATATTCAGCATCCTGACACTTACGACTCAGGCATGCAATCCAATACCGTACATC  
ACTATGCATTAATGACATCCCTGTCACTTGCATTAGACAATAACTACTATATTACACAATTAGACATA  
TCTTCGGCATATTTGTATGCAGACATCAAAGAAGAATTATACATAAGACCTCCACCACATTTAGGAAT  
GAATGATAAGTTGATACGTTTGAAGAAATCACTTTATGGATTGAAACAAAGTGGAGCGAACTGGTACG  
AAACTATCAAATCATACTGATACAACAATGTGGTATGGAAGAAGTTCGTGGATGGTCATGCGTATTT  
AAAAACAGTCAAGTGACAATTTGTTTATTCGTAGATGATATGGTATTGTTTTCGAAAAATCTAAATTC  
AAACAAAAGAATTATAGAGAAGCTTAAGATGCAATACGACACCAAGATTATAAATCTAGGCGAAAGTG  
ATGAGGAAATTCAATATGACATACTTGGCTTAGAAATCAAATATCAAAGAGGTAAATACATGAAATTA  
GGTATGGAAGAACTCATTAAGTGAAGAAATACCCAAATTAACCGTACCTTTGAATCCAAAAGGAAGAAA  
ACTTAGCGCTCCAGGTCAACCAGGTCTTTATATAGACCAGGATGAAGTAGAAATAGATGAAGATGAAT  
ACAAAGAGAAGGTACATGAAATGCAAAGTTGATTGGTCTAGCTTCATATGTTGGATATAAATTTAGA  
TTTGACTTACTATACTACATCAACACACTTGCTCAACATATACTATTCCCCTCTAGGCAAGTTTTAGA  
CATGACATATGAGTTGATACAATTCATGTGGGACACTAGAGATAAACAACCTGATATGGCACAAAAACA  
AACCTACCGAGCCAGATAATAAACTAGTCGCAATAAGTGATGCTTCGTATGGCAACCAACCGTATTAT  
AAATCACAAATTGGCAACATATATTTACTTAATGGAAAGGTAATTGGAGGAAAGTCCACCAAGGCTTC  
ATTAACATGTACTTCAACTACGGAAGCAGAAATACACGCGATAAGTGAATCTGTCCATTATTAAATA  
ATCTAAGTTACCTGATACAAGAACTTAACAAGAAACCAATTATTAAAGGCTTACTTACTGATAGTAGA  
TCAACGATCAGTATAATTAAGTCTACAAATGAAGAGAAATTTAGAAACAGATTTTTTGGCACAAAGGC  
AATGAGACTTAGAGATGAAGTATCAGGTAATAATTTATACGTATACTACATCGAGACCAAGAAGAACA  
TTGCTGATGTGATGACAAAACCTCTTCCGATAAAAACATTTAAACTATTAACAAATGGATTTCAT  
TAGATCTATCGATAAGCTTCTGCAGCTTTAAATAATCGGTGTCACTACATAAGAACACCTTTGGTGGA  
GGGAACATCGTTGGTACCATTGGGCGAGGTGGCTTCTCTTATGGCAACCGCAAGAGCCTTGAACGCAC  
TCTCACTACGGTGATGATCATTCTTGCCTCGCAGACAATCAACGTGGAGGGTAATTCTGCTAGCCTCT  
GCAAAGCTTTCAAGAAAATGCGGGATCATCTCGCAAGAGAGATCTCCTACTTTCTCCCTTTGCAAACC  
AAGTTCGACAACCTGCGTACGGCCTGTTTCGAAAGATCTACCACCGCTCTGGAAAGTGCCTCATCCAAAG  
GCGCAAATCCTGATCCAAACCTTTTTACTCCACGCACGGCCCCCTAGGGCCTCTTTAAAAGCTTGACCG  
AGAGCAATCCCGCAGTCTTCAGTGGTGTGATGGTCGTCTATGTGTAAGTCACCAATGCACTCAACGAT  
TAGCGACCAGCCGGAATGCTTGGGTATGTTAATATGGACTAAAGGAGGCTTTTCTGCAGGTGCACTCT  
AGAGGATCCCCGGGTACCGAGCTCGAATTTTTTACTAACAAATGGTATTATTTATAACAGCCAGAGCAT  
GTATCATATGGTCCAGAAACCTTATACCTGTGTGGACGTTAATCACTTGCGATTGTGTGGCCTGTTCT

GCTACTGCTTCTGCCTCTTTTTCTGGAAGATCGAGTGCTCTATCGCTAGGGGACCACCCTTTAAAGA  
GATCGCAATCTGAATCTTGGTTTCATTTGTAATACGCTTTACTAGGGCTTTCTGCTCTGTCATCTTTG  
CCTTCGTTTATCTTGCCTGCTCATTTTTTTAGTATATTCTTCGAAGAAATCACATTACTTTATATAATG  
TATAATTCATTATGTGATAATGCCAATCGCTAAGAAAAAAAAAGAGTCATCCGCTAGGTGGAAAAAA  
AAAATGAAAATCATTACCGAGGCATAAAAAAATATAGAGTGTAAGAGGCTCCAAGAGTGTAAGTA  
GGATCCCGCGGGGAGCTCGAATTCCGAGCTTATCGATAGATCTATTACATTATGGGTGGTATGTTGGA  
ATAGAAATCAACTATCATCTACTAACTAGTATTTACATTACTAGTATATTATCATATACGGTGTTAGA  
AGATGACGCAAATGATGAGAAATAGTCATCTAAATTAGTGGAAGCTGAAACGCAAGGATTGATAATGT  
AATAGGATCAATGAATATAAACATATAAAATGATGATAATAATATTTATAGAATTGTGTAGAATTGCA  
GATTCCCTTTTATGGATTCTAAATCCTTGAGGAGAACTTCTAGTATATTCTGTATACCTAATATTAT  
AGCCTTTATCAACAATGGAATCCCAACAATTATCTCAACATTCACCCATTTCTCA
